1 **Title:** Of Rats and Men, a Translational Model to Understand Vancomycin  
2 Pharmacokinetic/Toxicodynamic relationships.

3  
4 **Running Title:** Translating Rat to Man in VIKI

5  
6 **Authors:** Marc H. SCHEETZ<sup>1-3\*</sup>, Gwendolyn PAIS<sup>1-2</sup>, Thomas P. LODISE<sup>4</sup>, Steven Y.C. TONG<sup>5-7</sup>,  
7 Joshua S. DAVIS<sup>5</sup>, MBBS, PhD; J. Nicholas O'DONNELL<sup>4</sup>, Jiajun LIU<sup>8</sup>,  
8 Michael NEELY<sup>9</sup>, Walter C. PROZIALECK<sup>3</sup>, Peter C. LAMAR<sup>3</sup>, N.Jim RHODES<sup>1-2</sup>, Thomas  
9 HOLLAND<sup>10,11</sup>, Sean N. AVEDISSIAN<sup>12-13</sup>

10  
11 **Affiliations:**

12 <sup>1</sup> Department of Pharmacy Practice, Chicago College of Pharmacy, Midwestern University, Downers  
13 Grove, IL, USA;

14 <sup>2</sup>Midwestern University Chicago College of Pharmacy Center of Pharmacometric Excellence; <sup>3</sup>College  
15 of Graduate Studies, Department of Pharmacology, Midwestern University, Downers Grove, IL, USA.

16 <sup>4</sup>Department of Pharmacy Practice, Albany College of Pharmacy and Health Sciences, Albany, NY,

17 <sup>5</sup>Victorian Infectious Diseases Service, The Royal Melbourne Hospital, at the Peter Doherty Institute for  
18 Infection and Immunity, Melbourne, Australia

19 <sup>6</sup> Department of Infectious Diseases, The University of Melbourne at the Peter Doherty Institute for  
20 Infection and Immunity, Melbourne, Australia

21 <sup>7</sup>Menzies School of Health Research, Charles Darwin University, Darwin, NT0811, Australia

22 <sup>8</sup> Division of Pharmacometrics, Office of Clinical Pharmacology, Center for Drug Evaluation and  
23 Research, US Food and Drug Administration (FDA), Silver Spring, Maryland, USA;

24 <sup>9</sup>Children's Hospital Los Angeles and University of Southern California, Los Angeles, CA, USA;

25 <sup>10</sup>Duke University School of Medicine, Durham, NC, USA;

26 <sup>11</sup>Duke Clinical Research Institute, Durham, NC, USA;

27 <sup>12</sup>Antiviral Pharmacology Laboratory, University of Nebraska Medical Center (UNMC) Center for Drug  
28 Discovery, UNMC, Omaha, NE, USA;

29 <sup>13</sup>University of Nebraska Medical Center, College of Pharmacy, Omaha, NE, USA;;

30  
31 \* **Corresponding author and reprint requests:** Marc H. Scheetz, PharmD, MSc; Professor of  
32 Pharmacy Practice and Pharmacology; Midwestern University; 555 31st  
33 St., Downers Grove, IL 60515, Phone: 630-515-6116; Fax: 630-515-6958; Email:  
34 [mschee@midwestern.edu](mailto:mschee@midwestern.edu)

35  
36 **Running Title:** Vancomycin exposure driver for AKI

37  
38 **Transparency Declaration:** Dr. Scheetz has ongoing research contracts with Nevakar and  
39 SuperTrans Medical as well as having filed patent US10688195B2. All other authors have no other  
40 related conflicts of interest to declare.

41  
42 **Funding:** The animal work conducted was supported in part by National Institute of Allergy and  
43 Infectious Diseases under award numbers R15-AI105742 (MS, GP, TL, WP, PL) and modeling was  
44 performed under R21-AI149026 (Authors MS, GP, WP, PL). The PROVIDE study data was supported  
45 by the National Institute of Allergy and Infectious Diseases of the National Institutes of Health under  
46 Award Number UM1AI104681. SYCT is supported by an Australian National Health and Medical  
47 Research Council Career Development Fellowship (#1145033). The content is solely the responsibility  
48 of the authors and does not necessarily represent the official views of the National Institutes of Health  
49

50 **Word count:** 3842

**Abstract word count:** 268

51 **Abstract:**

52

53 **Background:** Vancomycin is a first line antibiotic for many common infectious diseases and is the most  
54 commonly prescribed antibiotic in the United States hospital setting. Vancomycin is also well known to  
55 cause kidney injury; two recent prospective studies have identified that increasing vancomycin area  
56 under the concentration curve predicts vancomycin induced kidney injury (VIKI). However, outside of  
57 clinical trials, it is unclear if pre-clinical data can quantitatively describe VIKI in patients.

58

59 **Methods:** Data were simultaneously analyzed from a pre-clinical rat model and two prospective clinical  
60 studies. Logged vancomycin area under the concentration curve (AUC) data for rats (n=48) and  
61 patients from PROVIDE (n=263) and CAMERA2 (n=291) were included. VIKI was defined as urinary  
62 KIM-1 concentrations  $\geq 9.42$  ng/mL in the rat and according to KDIGO stage 1 kidney injury for all  
63 human patients. Multiple generalized linear models were explored, and the order of magnitude was  
64 calculated between the probability of acute kidney injury (AKI) from the average obtained in the clinical  
65 studies (i.e. CAMERA2 and PROVIDE) and the rat for 0.1 increments in Log<sub>10</sub>AUC bounded common  
66 concentrations obtained in the therapeutic range (i.e. ~200 -800 mg\*24h/L).

67

68 **Results:** A logit link model best fit the data. When calculating the multiplicative factors between the  
69 studies therapeutic range AUCs, the rat was an average 2.7 to 4.2 times more sensitive to AKI between  
70 AUCs of 199.5 (i.e. log<sub>10</sub> AUC=2.3) and 794.3 mg\*h/L (i.e. log<sub>10</sub> AUC=2.9), respectively.

71

72 **Conclusions:** A pre-clinical rat model was quantitatively linked to toxicity data from two large human  
73 studies. The rat is an attractive pre-clinical model to explore exposure toxicity relationships with  
74 vancomycin. External validation is required.

75

76 **Introduction:**

77 As a first line antibiotic in consensus guidelines for serious and life-threatening infections,(14, 17,  
78 19, 44, 49, 50) vancomycin is the single most commonly prescribed antibiotic in the United States  
79 hospital setting.(12, 18, 25, 36, 37) In addition to common use, vancomycin is a drug well known to  
80 increase the risk of AKI.(38) A prospective study identified an excess 10% attributable AKI risk to  
81 vancomycin when compared to linezolid for treatment of methicillin-resistant *Staphylococcus aureus*  
82 (MRSA) pneumonia.(56) Based on 36.5 million hospital stays in the US annually(55) and vancomycin  
83 prevalence use of ~100 days of therapy/1000 patient days,(12, 18) even conservative estimates  
84 suggest that vancomycin causes kidney injury in over 300,000 people annually.

85 Vancomycin induced kidney injury (VIKI) is a concentration-driven process, with area under the  
86 concentration curve (AUC) and maximum concentrations best correlating with the extent of kidney  
87 damage.(8-10) Studies indicate that rates of VIKI were approximately 5-7% when troughs were  
88 maintained between 5-10 mg/L as the standard of practice.(27, 43, 46) With the publication of the 2009  
89 consensus vancomycin guidelines that promoted more aggressive dosing (i.e. troughs of 15-20 mg/L)  
90 for serious MRSA infections such as pneumonia (5, 45), studies indicate that VIKI is now considerably  
91 higher, with rates upwards of 40% depending on the patient population, without any improvements in  
92 effectiveness.(46) In an effort to minimize VIKI while maintaining comparable effectiveness, the revised  
93 2020 vancomycin guidelines tempered targeted exposures and recommended AUC- rather than trough-  
94 based dosing, with a daily AUC target of 400-600 mg\*h/L for serious MRSA infections.(41)

95 Support to transition from trough-only to AUC-guided dosing and monitoring was based, in part, on  
96 two recent prospective analyses that evaluated the efficacy and safety of vancomycin against MRSA  
97 bacteremia. In both the PROVIDE(23) and CAMERA2 (20, 51) studies, VIKI was found to increase as a  
98 function of the daily AUC, especially among patients with daily AUCs in excess of 600 mg\*h/L.  
99 However, patients with vancomycin exposures within the newly recommended daily AUC therapeutic  
100 range of 400-600 mg\*h/L were also found to be at increased risk of VIKI. (20, 23) The exact magnitude  
101 of AKI attributable to vancomycin in these studies is unclear as they lacked a control group who did not

102 receive vancomycin and many patients who received vancomycin had other risk factors for AKI.  
103 However, these data suggest that over half the cases were likely attributable to vancomycin.(47) Given  
104 the high frequency of vancomycin use and considerable potential for VIKI associated with maintaining  
105 daily AUCs within the newly recommended range of 400-600 mg\*h/L, there is a critical need to identify  
106 vancomycin exposure profiles that minimize VIKI in clinical practice. Ideally, it would be preferred to  
107 identify optimal vancomycin dosing and monitoring practices that minimize VIKI in a clinical trial.  
108 However, the costs and time associated with execution of well-designed studies in patients greatly  
109 limits the ability to generate timely results. Therefore, a pre-clinical model is sorely needed that is  
110 reflective of the vancomycin exposure-VIKI experience in patients as it will surmount many of the  
111 aforementioned barriers associated with completion of clinical studies and provide quantitative  
112 information in a shorter timeframe. In particular, the availability of a reliable and accurate pre-clinical  
113 VIKI model will identify vancomycin dosing schemes associated with the lowest risk of VIKI, determine  
114 if ameliorating agents can minimize the risk of VIKI with vancomycin exposures required for efficacy,  
115 and assess populations in which vancomycin should be avoided (e.g., those receiving other  
116 nephrotoxic agents). Our group has utilized a pre-clinical rat model that describes the risk of VIKI as a  
117 function of the intensity of vancomycin exposure(9, 31, 34, 39). While our model demonstrates that  
118 there is a clear relationship between vancomycin AUC and VIKI in rats, we have yet to determine if our  
119 model bridges to humans. To this end, we sought to evaluate the relationship between vancomycin  
120 AUC and VIKI from our translational rat model and the clinical studies, PROVIDE and CAMERA2(23,  
121 51).

122 **Methods:**

123 *Data Sources*

124 *Animal data*

125 The relationship between vancomycin exposure and VIKI were obtained from our previously  
126 published rat study.(10) In brief, this pharmacokinetic/toxicodynamic PK/TD study (IACUC; Protocol  
127 #2295) was conducted at Midwestern University in Downers Grove, IL in compliance with the National  
128 Institutes of Health Guide for the Care and Use of Laboratory Animals.[(1)]. In this study, male  
129 Sprague-Dawley rats (n=48, approximately 8-10 weeks old, mean weight 310g) received intravenous  
130 saline (controls) or intravenous vancomycin (150 mg/kg/day to 400 mg/kg/day as once or twice daily  
131 dosing for a period of 24 hours). The dosing range was selected previous studies (10, 15, 30, 52) to  
132 ensure coverage of the clinical allometric range. For example, the clinical kidney injury threshold of  $\geq 4$   
133 grams/day in a 70-kg patient (i.e., 57 mg/kg/day in humans) scales allometrically to 350 mg/kg in the  
134 rat. (4, 21) Plasma was sampled for vancomycin assay (completed by LC-MS/MS) with up to 8 samples  
135 per rat over the course of the study. Twenty-four-hour urine was collected and assayed for kidney injury  
136 molecule 1 (KIM-1). PK exposures were obtained from each individual animal, with area under the  
137 concentration curve for the 24-hour period calculated in Pmetrics for R.(29) The 90th percentile  
138 effective concentration,  $EC_{90}$ , (i.e. vancomycin concentration required to achieve 90<sup>th</sup> percent maximum  
139 of KIM-1) was experimentally calculated from the fitted Hill model. Results were utilized as reported in  
140 the parent publication (10) with the exception that two errors were found in the calculation of KIM-1  
141 concentrations. These errors did not affect any of the published summary results or exposure response  
142 fits reported in the parent publication.

143

144 *Clinical Data:*

145 *CAMERA2.*

146 CAMERA2 was an open-label, international, pragmatic, randomized clinical trial performed at 27

147 hospitals between 2015 and 2018. The trial enrolled 352 hospitalized adults with MRSA bacteremia.  
148 Patients randomly received either 1) vancomycin or daptomycin plus an anti-staphylococcal  $\beta$ -lactam  
149 (intravenous flucloxacillin, cloxacillin, or cefazolin) (n = 174) or vancomycin or daptomycin alone (n =  
150 178).(51) Among these patients, 291 patients had their individual vancomycin exposures [i.e. area  
151 under the concentration curve (AUC)] estimated with a best-fit Bayesian PK model in a post-hoc  
152 analysis.(20) AUCs were calculated over 24 hour periods, and day 2 AUC best correlated with acute  
153 kidney injury outcomes described by modified-Kidney Disease Improving Global Outcomes (m-KDIGO)  
154 criteria (6, 20, 51) as well as risk, injury, failure, loss, and end-stage kidney disease (RIFLE)  
155 criteria(16). AUC24-48h cut-points for prediction of m-KDIGO  $\geq 1$ , m-KDIGO  $\geq 2$ , and m-KDIGO =3 were  
156 470.1, 496.1, and 525.5.(20)

157

158 *PROVIDE.*

159 *PROVIDE* was a prospective, observational study performed at 14 hospitals between 2014 and  
160 2015.(23) The study enrolled 265 hospitalized adults treated with vancomycin for their MRSA  
161 bacteremia. Patients received vancomycin therapeutic drug monitoring, and day 2 AUCs were  
162 estimated from a Bayesian maximal a posteriori probability procedure approach. Patients were followed  
163 for treatment success and acute kidney injury. Kidney injury was defined by RIFLE criteria and  
164 vancomycin-induced nephrotoxicity (VINT) definition in the vancomycin consensus guideline statement  
165 (42). Outcomes were further classified using a desirability of outcome ranking (DOOR) analysis.  
166 Efficacy was defined by 30-day mortality and lack of persistent bacteremia. The five categories were:  
167 death, survival with treatment failure and AKI, survival with treatment failure and no AKI, survival with  
168 treatment success and AKI, and finally survival with treatment success and no AKI. Patients with a day  
169 2 AUC  $\geq 793$  had higher rates of AKI and VIN vs to those with an AUC  $\leq 343$ . Patients in the 2 lowest  
170 AUC exposure quintiles (i.e. AUC  $\leq 515$ ), had the best global outcome (i.e. survival with treatment

171 success and no AKI) with rates  $\geq 71\%$  vs.  $\leq 61\%$  respectively.

Figure 1. Overview of the primary data utilized in this manuscript.

| Study                         | Rat                                                              | PROVIDE                                                                                                         | CAMERA2                                                                                                         |
|-------------------------------|------------------------------------------------------------------|-----------------------------------------------------------------------------------------------------------------|-----------------------------------------------------------------------------------------------------------------|
| Population                    | N=48 male Sprague Dawley rats                                    | N=263 patients with MRSA bacteremia                                                                             | N=291 patients with MRSA bacteremia                                                                             |
| Intervention/ Comparison      | Allometrically-scaled vancomycin dose escalation                 | Treated with vancomycin and received therapeutic drug monitoring                                                | Vancomycin plus flucloxacillin, cloxacillin, (n = 115) vs. vancomycin alone (n = 176)                           |
| Outcomes Linked in this Study | Urinary KIM-1 $\geq 9.42$ ug/mL<br>Histopathology score $\geq 2$ | Serum creatinine increase $\geq 0.3$ mg/dL within 48 h of baseline or 1.5x increase from baseline within 7 days | Serum creatinine increase $\geq 0.3$ mg/dL within 48 h of baseline or 1.5x increase from baseline within 7 days |

172 *Definition of AKI event:*

173 In the rat studies, AKI events were evaluated with urinary KIM-1 (Figure 1). Urinary KIM-1 was  
 174 chosen as the biomarker for linking as it has been demonstrated as the most sensitive and specific  
 175 biomarker for predicting histopathologic damage in the  
 176 rat.(33) For the rat, the vancomycin AUC  $EC_{90}$  was 482  
 177  $mg \cdot h/L$ , corresponding to a urinary  $Log_2$  KIM equal to  
 178  $2^{3.236} = 9.42$  ng/mL. The  $Log_2$  transformation of KIM is prudent  
 179 as KIM-1 elevations vs. control have been suggested to  
 180 follow fold changes, and control animals display  
 181 concentrations less than  $2^1 = 2$  ng/mL. Thus, the threshold  
 182 for injury was experimentally defined as approximately two  
 183 doubling fold changes, Figure 2.(10) Importantly, this value  
 184 also classified rat kidney injury well by histopathology. In

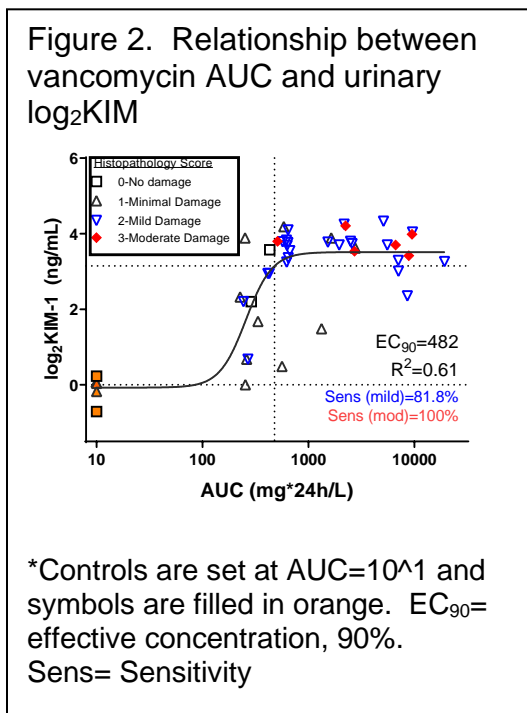



185 this analysis, histopathology scores ranged from 0-3 using the Predictive Safety Testing Consortium  
186 criteria from a blinded veterinary pathologist,(48) and control animals universally scored 0 or 1. The  
187 KIM-1 threshold correctly classified histopathology scores of 2 with a sensitivity of 81.8% and 3 with a  
188 sensitivity of 100%. In a secondary and exploratory analysis, histopathology scores of 2 or greater were  
189 used to define AKI for the rat in this study.

190 For the two clinical analyses, a common kidney injury endpoint was used; KDIGO stage 1  
191 criteria defined VIKI (20, 23, 51), and all patients that could be classified according to this endpoint  
192 were included (Figure 1). The KDIGO endpoint was chosen (i.e. serum creatinine [SCr] absolute  
193 increase of  $\geq 0.3$  mg/dL within 48 hours of baseline or 1.5x SCr increase from baseline within 7 days) to  
194 define VIKI as data shows that absolute changes in creatinine (vs. relative percentage changes) are  
195 more reliable for detection of renal insult when compared to measures that rely on relative changes (24,  
196 35, 53). In total, n=48, n=263, and n=291 subjects were included from the rat study,(10) PROVIDE (23),  
197 and CAMERA2 (20, 51) respectively. Five rats were controls and received no vancomycin.

198

199 *Statistical methods:*

200 Statistical analysis was performed in Stata/IC version 16.1 (College Station, TX) unless otherwise  
201 specified. All data were pooled, and subjects were categorized according to their parent study. VIKI  
202 was dichotomous in each dataset, and the probability of VIKI served as the endpoint. For the animal  
203 data, the day 1 AUC served as the primary exposure variable while the day 2 AUC was the primary  
204 vancomycin exposure variable in the clinical studies (23) (20). Day 2 was utilized for the human data as  
205 this has been the most consistent predictor of AKI from the prospective clinical studies. Multiple  
206 generalized linear models with maximum likelihood optimization were explored, including binomial  
207 family with logit and probit link with VIKI as the dichotomous outcome and vancomycin AUC as the  
208 primary predictor variable. The exact study (i.e. rat, PROVIDE, CAMERA2) was included as a  
209 categorical covariate in the model. Interactions were checked between AUCs and study group. Model



210 fits were compared with the Akaike information criterion (AIC) scores. Probabilities for AKI from each of  
211 the studies was predicted for incremental AUCs (mg/L\*hr) as a  $\log_{10}$  function between 0 and 6 with an  
212 increment of 0.1. Margins were calculated to estimate individual probabilities of AKI for each subject  
213 according to each study and across predicted  $\log_{10}$  AUC from the final fitted model. The order of  
214 magnitude was calculated between the probability of AKI from the average obtained in the clinical  
215 studies (i.e. CAMERA2 and PROVIDE) and the rat for 0.1 increments in  $\log_{10}$ AUCs in the therapeutic  
216 range (i.e. ~200 -800 mg\*24h/L).

217

218 *Human and animal assurances.*

219 Clinical data were collected under parent IRBs (20, 23). Analysis of de-identified data was obtained  
220 under data use agreements and classified as not-human-subjects research by the Midwestern  
221 University IRB. Rat work was conducted under Institutional Animal Care and Use Committee (IACUC)  
222 Protocol #2295.

223 **Results:**

224 AUCs from the rats receiving vancomycin ranged from  
 225 226.74 to 19,239 mg\*h/L, with a median of 643.1 and an  
 226 interquartile range of 427.7 to 2769.4. AUCs in  
 227 PROVIDE and CAMERA2 ranged from 94.3 to 1755  
 228 mg\*h/L and 159.3 to 1211.4 mg\*h/L, respectively with a  
 229 median of 578.1 and 398.7 and IQRs of 436.2 to 548.1  
 230 and 300.9 to 526.6 mg\*h/L, respectively. A total of 63%

231 of rats experienced kidney injury based on KIM-1 threshold and 67.4% experienced kidney injury based  
 232 on secondary outcome of a histopathology threshold. AKI rates for PROVIDE and CAMERA2 patients  
 233 were 17.5%, and 17.2%, respectively.

234  
 235 Model fits for the binomial family with  
 236 logit link (AIC 550.6) were slightly better  
 237 than with probit link (AIC 551.6). Thus,  
 238 logit models were used for application.

239 Interactions were not present between study group and  
 240 subject AUCs ( $p \geq 0.45$ ).  $\text{Log}_{10}\text{AUC}$ , as a continuous  
 241 function, predicted VIKI across all three datasets well.  
 242 Results from the logit link model, transformed to odds  
 243 ratios for the primary outcome, can be found in Table 1.  
 244 Probabilities of AKI were a function of AUC ( $P < 0.001$ ) as  
 245 well as individual study ( $P < 0.001$  for both), Figure 3.  
 246 Predicted probabilities did not significantly differ whether  
 247 rat AKI was classified by urinary KIM-1 value (Figure 3) or histopathologic cut-point (Figure S1). The

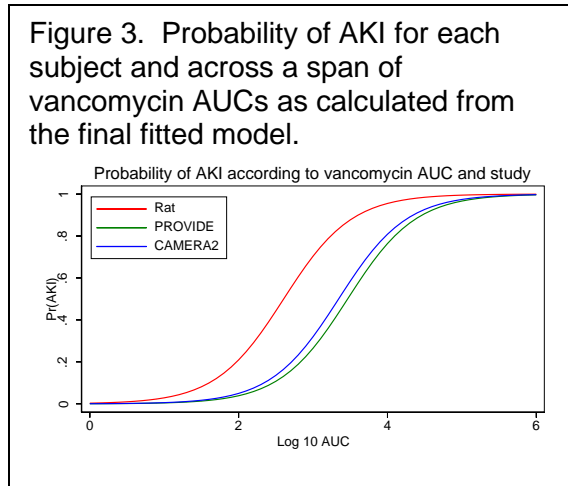

Table 1. Independent odds of kidney injury with the rat model as the referent group.

|              | Odds Ratio   | P value | 95% CI |       |
|--------------|--------------|---------|--------|-------|
| log 10 AUC   | 8.97         | P<0.001 | 3.23   | 24.87 |
| <i>Study</i> |              |         |        |       |
| Rat          | 1 [referent] |         |        |       |
| PROVIDE      | 0.15         | P<0.001 | 0.68   | 0.34  |
| CAMERA2      | 0.20         | P<0.001 | 0.09   | 0.45  |

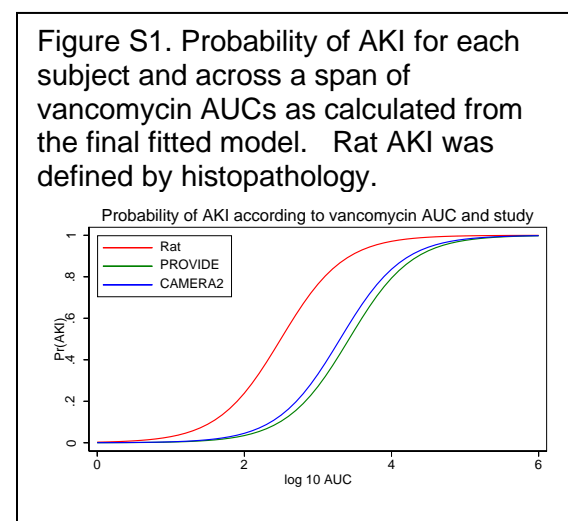

248 95% confidence intervals for CAMERA2 and PROVIDE completely overlapped for the range of AUCs  
 249 studied (data not shown). When calculating the multiplicative factors between the studies for  
 250 therapeutic AUCs, the rat was an average 2.1 to 3.1 times more sensitive to AKI across AUCs of 199.5  
 251 (i.e. log<sub>10</sub> AUC=2.3) to 794.3 mg\*h/L (i.e. log<sub>10</sub> AUC=2.9), respectively (Table 2).

Table 2. Probabilities of AKI across commonly achieve AUCs within the vancomycin therapeutic range and linking factor between the studies.

| AUC (mg*h/L) | log <sub>10</sub> AUC | Probability of AKI, Rat | Probability of AKI, PROVIDE | Probability of AKI, CAMERA2 | Factor PROVIDE vs Rat | Factor CAMERA2 vs rat | Average factor between human and rat |
|--------------|-----------------------|-------------------------|-----------------------------|-----------------------------|-----------------------|-----------------------|--------------------------------------|
| 199.5262315  | 2.3                   | 0.3387                  | 0.0720922                   | 0.0920138                   | 4.69815042            | 3.68096959            | 4.189560009                          |
| 251.1886432  | 2.4                   | 0.3894231               | 0.0882147                   | 0.1120534                   | 4.41449214            | 3.47533497            | 3.944913558                          |
| 316.227766   | 2.5                   | 0.4426576               | 0.1075249                   | 0.1358047                   | 4.11679155            | 3.25951606            | 3.688153804                          |
| 398.1071706  | 2.6                   | 0.4972428               | 0.1304572                   | 0.1636624                   | 3.81153972            | 3.03822259            | 3.424881154                          |
| 501.1872336  | 2.7                   | 0.551894                | 0.1574179                   | 0.195939                    | 3.50591642            | 2.81666233            | 3.161289373                          |
| 630.9573445  | 2.8                   | 0.6053197               | 0.1887409                   | 0.2328091                   | 3.20714641            | 2.6000689             | 2.903607654                          |
| 794.3282347  | 2.9                   | 0.6563422               | 0.2246349                   | 0.2742507                   | 2.92181758            | 2.39321978            | 2.65751868                           |

\*\* KDIGO stage 1 criteria (i.e. serum creatinine [SCr] absolute increase of ≥0.3 mg/dL within 48 hours of baseline OR SCr increase of 1.5x within 7 days from baseline) was used to define VIKI in CAMERA2 and PROVIDE. VIKI defined in rat as a urinary KIM-1 ≥ 9.42 ng/mL

252 **Discussion:**

253 Overall, we found that VIKI increased as a function of the daily  $\text{Log}_{10}$  AUC in a predictable  
254 fashion across the rat and two human studies. Quantitatively, the rat model was 2.1 to 3.1 times more  
255 sensitive in detecting VIKI across therapeutic AUCs observed in PROVIDE and CAMERA2. The  
256 quantitative link across the studies indicates that the rat model can be used to reliably forecast the  
257 expected rate of VIKI at a given AUC value in adult patients receiving vancomycin. Functionally, this  
258 can be interpreted with the plotted probabilities (e.g. Figure 3). That is, for any given dose plotted on  
259 the x-axis, the expected probability of event (i.e. the rat achieving urinary KIM-1 concentrations  $\geq 9.42$   
260 ng/mL or histopathology  $\geq 2$  in a 24 hour model and humans achieving serum creatinine absolute  
261 increase of  $\geq 0.3$  mg/dL within 48 hours of baseline or 1.5x SCr increase from baseline within 7 days).  
262 Importantly, confirmation that our rat model is highly translatable to humans has important implications  
263 for clinical practice as our linked model provides an efficient way to identify optimal candidate  
264 vancomycin dosing strategies that minimize VIKI for potential use into clinical practice. Clinical trials will  
265 always be the gold standard for assessing exposure-response relationships but they are expensive  
266 (costs are a median of \$41,000 per enrolled patient (28), are generally designed to answer a single  
267 question, and take many years to complete. Directly relevant, CAMERA2 cost ~ \$US 2M and took 4  
268 years to complete whereas PROVIDE cost ~5 million dollars and required 3 years to complete.  
269 Translatable pre-clinical models can also be used to provide immediate insights into questions such as:  
270 “Can VIKI be minimized by altering the concentration-time curve?; Can VIKI be ameliorated with co-  
271 administration of a prophylactic or rescue agent?; Does the therapeutic window change when common  
272 co-nephrotoxins are given?” All of these questions are commonly faced clinically, yet each question  
273 requires a clinical trial. With limited resources, pre-clinical models such as the one evaluated in this  
274 study provide a screening mechanism to ensure that only the most promising ideas are evaluated in a  
275 clinical trial.

276 The demonstrable link between the rat and human studies are biologically plausible. The rat is a  
277 well-developed model for acute kidney injury, and newer biomarkers such as KIM-1 are highly relevant

278 as they are shared between humans and rats.(2, 3) KIM-1 is a specific marker of histopathologic  
279 proximal tubule injury in VIKI (11, 30) as well as is qualified by the FDA for drug induced acute kidney  
280 injury in both human and rat drug studies.(7) Our findings were isometric depending on whether we  
281 used a KIM-1 or a histopathological cut-point. For the VIKI model, we favored using KIM-1 as urinary  
282 samples are easy to obtain longitudinally (and do not require animal sacrifice). Further, KIM-1 is very  
283 sensitive for prediction of histopathologic damage (Figure 1) which is still considered by some as the  
284 gold standard for translational toxicological studies.

285 Several points should be noted when evaluating the findings. The rat model relied on day 1  
286 estimates of vancomycin exposure in 24 hour experiments and used KIM-1 to define VIKI. We believe it  
287 was appropriate to use the AUC:KIM-1 data from the 24-hour rat studies in the exposure response  
288 analyses and link them to day 2 AUC:SCr VIKI endpoints in the human studies. We have observed in  
289 our model that KIM-1 increases on day 1 with vancomycin treatment and plateaus for several days in  
290 our more prolonged experiments (34). Thus, one day experiments appear sufficient to define the injury  
291 profile. In the translational pre-clinical model, the goal is to obtain a marker that is not in the causal  
292 pathway for injury and thus measure a predictor rather than an intermediate surrogate for toxicity that  
293 has already occurred (e.g. vancomycin AUC increases because glomerular filtration has already  
294 decreased).

295 In CAMERA2 and PROVIDE, the vancomycin exposure-VIKI response curve was explained by the  
296 day 2 AUC(20, 23). We also believe it was appropriate to examine the day 2 AUC in patients relative to  
297 day 1 as it is more indicative of near steady-state conditions and the maintenance vancomycin regimen  
298 patients received during the early course of vancomycin therapy. In clinical patients, day 1  
299 concentration profiles are also potentially more variable than day 2, as varying renal function is more  
300 prevalent during the initial period when patients are being managed for sepsis. Day 2 was also selected  
301 for the clinical data because this is when vancomycin concentration-time data would be most likely  
302 obtained (22, 26, 56). Ultimately, the best approach for future human trials will be to see if early  
303 biomarkers such as KIM-1 can predict clinical toxicity before the more standard clinical markers such as

304 serum creatinine. This would enable clinicians to change therapy prior to more substantial damage, and  
305 once data for KIM-1 become available from human trials, the rat model can be re-calibrated.

306 In humans, SCr is the common clinical biomarker for defining acute kidney injury (6), but it is  
307 known to be a delayed indicator of renal injury and decline in renal function(57). Because of renal  
308 reserve, SCr only increases after a substantial amount of damage has occurred to the nephrons. It is  
309 estimated that greater than 40% reductions are needed in CrCL in order to observe creatinine changes  
310 within reasonable time frames such as within 48 hours (40, 54). Based on the amount of pre-existing  
311 kidney damage, the SCr may take 24–36 hours to rise after a definite renal insult (13, 32, 54).

312 Therefore, we examined VIKI events downstream from the initial exposure as the injury process likely  
313 started several days prior to SCr elevation in human studies. In contrast, urinary KIM-1 rises are  
314 detectable within 9 hours of insult (52) and are sensitive and specific for proximal tubule damage  
315 specifically with VIKI (33). Thus, KIM-1 is an ideal maker for VIKI, allowing for the most proximal linking  
316 between antecedent vancomycin exposure and damage. This toxicologic model can be envisioned  
317 similar to other clinical PK/PD analyses in which the achieving of early exposure targets is linked to  
318 outcomes like clinical response at test of cure or 28-day mortality. *In vivo* or *in vitro* models utilized for  
319 prediction of outcomes are simplifications (by necessity) of the human condition and outcomes.

320 In PROVIDE, the unadjusted and  
321 adjusted risk ratio between AUC and  
322 VIKI endpoints were nearly identical,  
323 suggesting that the observed results  
324 were accurate on both the population  
325 and patient level and not modified  
326 significantly by covariates. In  
327 CAMERA2, receipt of flucloxacillin  
328 resulted in more kidney injury. In a  
329 sensitivity analysis in which we  
330 separated patients by their receipt of

331 flucloxacillin, it was observed that patients who received flucloxacillin had rates of VIKI according to  
332 AUC that were similar to the whole population PROVIDE dataset (Figure S2), yet overall relationships  
333 from our primary analysis were highly explanatory (Figure2) so we more conservatively included all  
334 patients from CAMERA2 (as opposed to restricting analyses only to patients with flucloxacillin).

335 This study has several limitations. First, these animal studies have been performed in one  
336 laboratory and appear to have good internal validity; however, external validation is required to confirm  
337 if others are able to replicate similar exposure response curves in the rat and determine if individual  
338 models require calibration. Second, we utilized all available data meeting inclusion criteria requirements  
339 from the clinical studies and did not make any adjustments for patient covariates (e.g. co-nephrotoxins)  
340 in our primary analysis. A sensitivity analysis identified that patients that received flucloxacillin in  
341 CAMERA2 demonstrated similar VIKI rates for matched AUCs in the patient population from PROVIDE.  
342 The current analyses demonstrate that linking rat data to human data at the population level is possible.  
343 Future work will need to test covariates in the rat and recalibrate a link with the stratified human data.

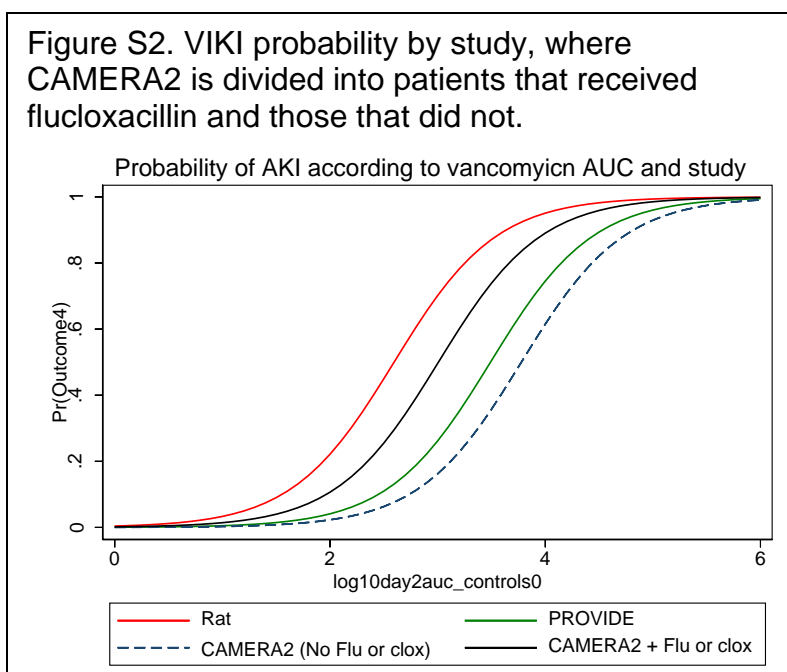



344 **Conclusion:**

345 We have demonstrated that a rat model links to kidney outcomes from the clinical studies,  
346 PROVIDE and CAMERA2. The rat is a useful model that has the potential to provide quantitative  
347 information on the shift of the vancomycin toxicity curve in humans. Rat models can be applied to focus  
348 on distinct questions of interest (such as combinatorial therapy) and can serve as an initial assessment  
349 before clinical trials are conducted, thus improving understanding in the setting of no clinical data and  
350 clinical data that suffers from confounding relationships. External validation and replication are needed  
351 to verify the translational nature of our animal model.

352 **References:**

- 353 1. 2011. *In th* (ed.), Guide for the Care and Use of Laboratory Animals, Washington (DC).  
354 2. Food and Drug Administration. Biomarker Qualification Program Office of Clinical  
355 Pharmacology Full Qualification Package Review. Accessed 5/11/2020. Available at  
356 <https://www.fda.gov/media/93150/download>.  
357 3. Food and Drug Administration. Review of Qualification Data for Biomarkers of Nephrotoxicity  
358 Submitted by the Predictive Safety Testing Consortium. Accessed 5/11/2020. Available at  
359 <https://www.fda.gov/media/87781/download>.  
360 4. Guidance for Industry. Estimating the Maximum Safe Starting Dose in Initial Clinical Trials for  
361 Therapeutics in Adult Healthy Volunteers. U.S. Department of Health and Human Services.  
362 Food and Drug Administration. Center for Drug Evaluation and Research (CDER). 2005.  
363 Available at  
364 [https://www.fda.gov/downloads/Drugs/Guidances/UCM078932.pdf%23search=%27guidekines+](https://www.fda.gov/downloads/Drugs/Guidances/UCM078932.pdf%23search=%27guidekines+for+industry+sfe+starting%27)  
365 [for+industry+sfe+starting%27](https://www.fda.gov/downloads/Drugs/Guidances/UCM078932.pdf%23search=%27guidekines+for+industry+sfe+starting%27).  
366 5. 2005. Guidelines for the Management of Adults with Hospital-acquired, Ventilator-associated,  
367 and Healthcare-associated Pneumonia. *Am. J. Respir. Crit. Care Med.* **171**:388-416.  
368 6. 2012. Kidney Disease: Improving Global Outcomes (KDIGO) Acute Kidney Injury Work  
369 Group. KDIGO Clinical Practice Guideline for Acute Kidney Injury. *Kidney Int. Suppl.* **2**:1-138.  
370 7. US Food and Drug Administration. Critical Path Institute's Predictive Safety Testing  
371 Consortium Nephrotoxicity Working Group (CPATH PSTC-NWG), and Foundation for the  
372 National Institutes of Health's Biomarker Consortium Kidney Safety Biomarker Project Team  
373 (FNIH BC-KSP). Urinary nephrotoxicity biomarker panel as assessed by immunoassays. Safety  
374 biomarker panel to aid in the detection of kidney tubular injury in phase 1 trials in healthy  
375 volunteers. Available at  
376 [https://www.fda.gov/Drugs/DevelopmentApprovalProcess/DrugDevelopmentToolsQualification](https://www.fda.gov/Drugs/DevelopmentApprovalProcess/DrugDevelopmentToolsQualificationProgram/BiomarkerQualificationProgram/ucm535383.htm)  
377 [Program/BiomarkerQualificationProgram/ucm535383.htm](https://www.fda.gov/Drugs/DevelopmentApprovalProcess/DrugDevelopmentToolsQualificationProgram/BiomarkerQualificationProgram/ucm535383.htm).  
378 8. **Aljefri, D. M., S. N. Avedissian, N. J. Rhodes, M. J. Postelnick, K. Nguyen, and M. H.**  
379 **Scheetz.** 2019. Vancomycin Area Under the Curve and Acute Kidney Injury: A Meta-analysis.  
380 *Clin Infect Dis* **69**:1881-1887.  
381 9. **Avedissian, S. N., G. Pais, J. Liu, J. N. O'Donnell, T. P. Lodise, M. Neely, W. C. Prozialeck,**  
382 **P. C. Lamar, L. Becher, and M. H. Scheetz.** 2020. The Pharmacodynamic-Toxicodynamic  
383 Relationship of AUC and CMAX in Vancomycin Induced Kidney Injury in an Animal Model.  
384 *Antimicrob Agents Chemother.*  
385 10. **Avedissian, S. N., G. M. Pais, J. N. O'Donnell, T. P. Lodise, J. Liu, W. C. Prozialeck, M. D.**  
386 **Joshi, P. C. Lamar, L. Becher, A. Gulati, W. Hope, and M. H. Scheetz.** 2019. Twenty-four  
387 hour pharmacokinetic relationships for intravenous vancomycin and novel urinary biomarkers of  
388 acute kidney injury in a rat model. *J Antimicrob Chemother* **74**:2326-2334.  
389 11. **Avedissian, S. N., G. M. Pais, J. N. O'Donnell, T. P. Lodise, J. Liu, W. C. Prozialeck, M. D.**  
390 **Joshi, P. C. Lamar, L. Becher, A. Gulati, W. Hope, and M. H. Scheetz.** 2019. Twenty-four  
391 hour pharmacokinetic relationships for intravenous vancomycin and novel urinary biomarkers of  
392 acute kidney injury in a rat model. *J Antimicrob Chemother.*  
393 12. **Baggs, J., S. K. Fridkin, L. A. Pollack, A. Srinivasan, and J. A. Jernigan.** 2016. Estimating  
394 National Trends in Inpatient Antibiotic Use Among US Hospitals From 2006 to 2012. *JAMA*  
395 *Intern Med* **176**:1639-1648.  
396 13. **Duarte, C. G., and H. G. Preuss.** 1993. Assessment of renal function--glomerular and tubular.  
397 *Clinics in laboratory medicine* **13**:33-52.

- 398 14. **Freifeld, A. G., E. J. Bow, K. A. Sepkowitz, M. J. Boeckh, J. I. Ito, C. A. Mullen, Raad, II,**  
399 **K. V. Rolston, J. A. Young, J. R. Wingard, and A. Infectious Diseases Society of.** 2011.  
400 Clinical practice guideline for the use of antimicrobial agents in neutropenic patients with  
401 cancer: 2010 update by the infectious diseases society of america. *Clin Infect Dis* **52**:e56-93.
- 402 15. **Fuchs, T. C., K. Frick, B. Emde, S. Czasch, F. von Landenberg, and P. Hewitt.** 2012.  
403 Evaluation of novel acute urinary rat kidney toxicity biomarker for subacute toxicity studies in  
404 preclinical trials. *Toxicologic pathology* **40**:1031-1048.
- 405 16. **Hoste, E. A., G. Clermont, A. Kersten, R. Venkataraman, D. C. Angus, D. De Bacquer, and**  
406 **J. A. Kellum.** 2006. RIFLE criteria for acute kidney injury are associated with hospital mortality  
407 in critically ill patients: a cohort analysis. *Crit Care* **10**:R73.
- 408 17. **Kalil, A. C., M. L. Metersky, M. Klompas, J. Muscedere, D. A. Sweeney, L. B. Palmer, L.**  
409 **M. Napolitano, N. P. O'Grady, J. G. Bartlett, J. Carratala, A. A. El Solh, S. Ewig, P. D.**  
410 **Fey, T. M. File, Jr., M. I. Restrepo, J. A. Roberts, G. W. Waterer, P. Cruse, S. L. Knight,**  
411 **and J. L. Brozek.** 2016. Management of Adults With Hospital-acquired and Ventilator-  
412 associated Pneumonia: 2016 Clinical Practice Guidelines by the Infectious Diseases Society of  
413 America and the American Thoracic Society. *Clin Infect Dis* **63**:e61-e111.
- 414 18. **Kelesidis, T., N. Braykov, D. Z. Uslan, D. J. Morgan, S. Gandra, B. Johannsson, M. L.**  
415 **Schweizer, S. A. Weisenberg, H. Young, J. Cantey, E. Perencevich, E. Septimus, A.**  
416 **Srinivasan, and R. Laxminarayan.** 2016. Indications and Types of Antibiotic Agents Used in 6  
417 Acute Care Hospitals, 2009-2010: A Pragmatic Retrospective Observational Study. *Infect.*  
418 *Control Hosp. Epidemiol.* **37**:70-79.
- 419 19. **Liu, C., A. Bayer, S. E. Cosgrove, R. S. Daum, S. K. Fridkin, R. J. Gorwitz, S. L. Kaplan,**  
420 **A. W. Karchmer, D. P. Levine, B. E. Murray, J. R. M, D. A. Talan, H. F. Chambers, and A.**  
421 **Infectious Diseases Society of.** 2011. Clinical practice guidelines by the infectious diseases  
422 society of america for the treatment of methicillin-resistant *Staphylococcus aureus* infections in  
423 adults and children. *Clin Infect Dis* **52**:e18-55.
- 424 20. **Liu, J., S. Y. C. Tong, J. S. Davis, N. J. Rhodes, M. H. Scheetz, and C. S. G. the.** 2020.  
425 Vancomycin exposure and acute kidney injury outcome: a snapshot from the CAMERA2 study.  
426 *Open Forum Infectious Diseases.*
- 427 21. **Lodise, T. P., B. Lomaestro, J. Graves, and G. L. Drusano.** 2008. Larger vancomycin doses  
428 (at least four grams per day) are associated with an increased incidence of nephrotoxicity.  
429 *Antimicrob Agents Chemother* **52**:1330-1336.
- 430 22. **Lodise, T. P., N. Patel, B. M. Lomaestro, K. A. Rodvold, and G. L. Drusano.** 2009.  
431 Relationship between initial vancomycin concentration-time profile and nephrotoxicity among  
432 hospitalized patients. *Clin Infect Dis* **49**:507-514.
- 433 23. **Lodise, T. P., S. L. Rosenkranz, M. Finnemeyer, S. Evans, M. Sims, M. J. Zervos, C. B.**  
434 **Creech, P. C. Patel, M. Keefer, P. Riska, F. P. Silveira, M. Scheetz, R. G. Wunderink, M.**  
435 **Rodriguez, J. Schrank, S. C. Bleasdale, S. Schultz, M. Barron, A. Stapleton, D. Wray, H.**  
436 **Chambers, V. G. Fowler, and T. L. Holland.** 2020. The Emperor's New Clothes: PRospective  
437 Observational Evaluation of the Association Between Initial Vancomycin Exposure and Failure  
438 Rates Among ADult HospitalizEd Patients With Methicillin-resistant *Staphylococcus aureus*  
439 Bloodstream Infections (PROVIDE). *Clin Infect Dis* **70**:1536-1545.
- 440 24. **Lopes, J. A., and S. Jorge.** 2013. The RIFLE and AKIN classifications for acute kidney injury:  
441 a critical and comprehensive review. *Clin Kidney J* **6**:8-14.
- 442 25. **Magill, S. S., J. R. Edwards, Z. G. Beldavs, G. Dumyati, S. J. Janelle, M. A. Kainer, R.**  
443 **Lynfield, J. Nadle, M. M. Neuhauser, S. M. Ray, K. Richards, R. Rodriguez, D. L.**

- 444 **Thompson, S. K. Fridkin, I. Emerging Infections Program Healthcare-Associated, and T.**  
445 **Antimicrobial Use Prevalence Survey.** 2014. Prevalence of antimicrobial use in US acute care  
446 hospitals, May-September 2011. *JAMA* **312**:1438-1446.
- 447 26. **Minejima, E., J. Choi, P. Beringer, M. Lou, E. Tse, and A. Wong-Beringer.** 2011. Applying  
448 New Diagnostic Criteria for Acute Kidney Injury To Facilitate Early Identification of  
449 Nephrotoxicity in Vancomycin-Treated Patients. *Antimicrob Agents Ch* **55**:3278-3283.
- 450 27. **Moellering, R. C., Jr.** 2006. Vancomycin: a 50-year reassessment. *Clin Infect Dis* **42 Suppl**  
451 **1**:S3-4.
- 452 28. **Moore, T. J., H. Zhang, G. Anderson, and G. C. Alexander.** 2018. Estimated Costs of Pivotal  
453 Trials for Novel Therapeutic Agents Approved by the US Food and Drug Administration, 2015-  
454 2016. *JAMA Intern Med* **178**:1451-1457.
- 455 29. **Neely, M. N., M. G. van Guilder, W. M. Yamada, A. Schumitzky, and R. W. Jelliffe.** 2012.  
456 Accurate detection of outliers and subpopulations with Pmetrics, a nonparametric and parametric  
457 pharmacometric modeling and simulation package for R. *Therapeutic drug monitoring* **34**:467-  
458 476.
- 459 30. **O'Donnell, J. N., N. J. Rhodes, T. P. Lodise, W. C. Prozialeck, C. M. Miglis, M. D. Joshi, N.**  
460 **Venkatesan, G. Pais, C. Cluff, P. C. Lamar, S. Briyal, J. Z. Day, A. Gulati, and M. H.**  
461 **Scheetz.** 2017. 24-Hour Pharmacokinetic Relationships for Vancomycin and Novel Urinary  
462 Biomarkers of Acute Kidney Injury. *Antimicrob Agents Chemother* **61**:e00416-00417.
- 463 31. **O'Donnell, J. N., N. J. Rhodes, T. P. Lodise, W. C. Prozialeck, C. M. Miglis, M. D. Joshi, N.**  
464 **Venkatesan, G. Pais, C. Cluff, P. C. Lamar, S. Briyal, J. Z. Day, A. Gulati, and M. H.**  
465 **Scheetz.** 2017. 24-Hour Pharmacokinetic Relationships for Vancomycin and Novel Urinary  
466 Biomarkers of Acute Kidney Injury. *Antimicrob Agents Chemother* **61**.
- 467 32. **Ostermann, M., and M. Joannidis.** 2016. Acute kidney injury 2016: diagnosis and diagnostic  
468 workup. *Crit Care* **20**:299.
- 469 33. **Pais, G. M., S. N. Avedissian, J. N. O'Donnell, N. J. Rhodes, T. P. Lodise, W. C. Prozialeck,**  
470 **P. C. Lamar, C. Cluff, A. Gulati, J. C. Fitzgerald, K. J. Downes, A. F. Zuppa, and M. H.**  
471 **Scheetz.** 2019. Comparative Performance of Urinary Biomarkers for Vancomycin-Induced  
472 Kidney Injury According to Timeline of Injury. *Antimicrob Agents Chemother* **63**.
- 473 34. **Pais, G. M., J. Liu, S. N. Avedissian, D. Hiner, T. Xanthos, A. Chalkias, E. d'Aloja, E.**  
474 **Locci, A. Gilchrist, W. C. Prozialeck, N. J. Rhodes, T. P. Lodise, J. C. Fitzgerald, K. J.**  
475 **Downes, A. F. Zuppa, and M. H. Scheetz.** 2020. Lack of synergistic nephrotoxicity between  
476 vancomycin and piperacillin/tazobactam in a rat model and a confirmatory cellular model. *J*  
477 *Antimicrob Chemother* **75**:1228-1236.
- 478 35. **Pais, G. M., J. Liu, S. Zepcan, S. N. Avedissian, N. J. Rhodes, K. J. Downes, G. S. Moorthy,**  
479 **and M. H. Scheetz.** 2020. Vancomycin-Induced Kidney Injury: Animal Models of  
480 Toxicodynamics, Mechanisms of Injury, Human Translation, and Potential Strategies for  
481 Prevention. *Pharmacotherapy* **40**:438-454.
- 482 36. **Pakyz, A. L., C. MacDougall, M. Oinonen, and R. E. Polk.** 2008. Trends in antibacterial use  
483 in US academic health centers: 2002 to 2006. *Arch. Intern. Med.* **168**:2254-2260.
- 484 37. **Polk, R. E., S. F. Hohmann, S. Medvedev, and O. Ibrahim.** 2011. Benchmarking risk-adjusted  
485 adult antibacterial drug use in 70 US academic medical center hospitals. *Clin Infect Dis* **53**:1100-  
486 1110.
- 487 38. **Rhee, C., S. S. Kadri, J. P. Dekker, R. L. Danner, H. C. Chen, D. Fram, F. Zhang, R.**  
488 **Wang, M. Klompas, and C. D. C. P. E. Program.** 2020. Prevalence of Antibiotic-Resistant

- 489 Pathogens in Culture-Proven Sepsis and Outcomes Associated With Inadequate and Broad-  
490 Spectrum Empiric Antibiotic Use. *JAMA Netw Open* **3**:e202899.
- 491 39. **Rhodes, N. J., W. C. Prozialeck, T. P. Lodise, N. Venkatesan, J. N. O'Donnell, G. Pais, C.**  
492 **Cluff, P. C. Lamar, M. N. Neely, A. Gulati, and M. H. Scheetz.** 2016. Evaluation of  
493 Vancomycin Exposures Associated with Elevations in Novel Urinary Biomarkers of Acute  
494 Kidney Injury in Vancomycin-Treated Rats. *Antimicrob Agents Chemother* **60**:5742-5751.
- 495 40. **Ronco, C., and M. H. Rosner.** 2012. Acute kidney injury and residual renal function. *Crit Care*  
496 **16**:144.
- 497 41. **Rybak, M., Le J, T. Lodise, L. DP, J. Bradley, C. Liu, B. Mueller, M. Pai, A. Wong-**  
498 **Beringer, J. Rotschafer, K. Rodvold, H. Maples, and B. Lomaestro.** 2020. Therapeutic  
499 monitoring of vancomycin for serious methicillin-resistant *Staphylococcus aureus* infections: A  
500 revised consensus guideline and review of the American Society of Health-System Pharmacists,  
501 the Infectious Diseases Society of America, the Pediatric Infectious Diseases Society and the  
502 Society of Infectious Diseases Pharmacists. *AJHP*--- info pending.
- 503 42. **Rybak, M., B. Lomaestro, J. C. Rotschafer, R. Moellering, Jr., W. Craig, M. Billeter, J. R.**  
504 **Dalovisio, and D. P. Levine.** 2009. Therapeutic monitoring of vancomycin in adult patients: a  
505 consensus review of the American Society of Health-System Pharmacists, the Infectious  
506 Diseases Society of America, and the Society of Infectious Diseases Pharmacists. *Am J Health*  
507 *Syst Pharm* **66**:82-98.
- 508 43. **Rybak, M. J.** 2006. The pharmacokinetic and pharmacodynamic properties of vancomycin. *Clin*  
509 *Infect Dis* **42 Suppl 1**:S35-39.
- 510 44. **Rybak, M. J., J. Le, T. P. Lodise, D. P. Levine, J. S. Bradley, C. Liu, B. A. Mueller, M. P.**  
511 **Pai, A. Wong-Beringer, J. C. Rotschafer, K. A. Rodvold, H. D. Maples, and B. M.**  
512 **Lomaestro.** 2020. Therapeutic monitoring of vancomycin for serious methicillin-resistant  
513 *Staphylococcus aureus* infections: A revised consensus guideline and review by the American  
514 Society of Health-System Pharmacists, the Infectious Diseases Society of America, the Pediatric  
515 Infectious Diseases Society, and the Society of Infectious Diseases Pharmacists. *Am. J. Health.*  
516 *Syst. Pharm.*
- 517 45. **Rybak, M. J., B. M. Lomaestro, J. C. Rotschafer, R. C. Moellering, W. A. Craig, M.**  
518 **Billeter, J. R. Dalovisio, and D. P. Levine.** 2009. Vancomycin therapeutic guidelines: a  
519 summary of consensus recommendations from the infectious diseases Society of America, the  
520 American Society of Health-System Pharmacists, and the Society of Infectious Diseases  
521 Pharmacists. *Clin Infect Dis* **49**:325-327.
- 522 46. **Scheetz, M. H.** 2020. Vancomycin: The pendulum swings. *Am J Health Syst Pharm* **77**:810-811.
- 523 47. **Sinha Ray, A., A. Haikal, K. A. Hammoud, and A. S. Yu.** 2016. Vancomycin and the Risk of  
524 AKI: A Systematic Review and Meta-Analysis. *Clin J Am Soc Nephrol* **11**:2132-2140.
- 525 48. **Sistare, F. D., F. Dieterle, S. Troth, D. J. Holder, D. Gerhold, D. Andrews-Cleavenger, W.**  
526 **Baer, G. Betton, D. Bounous, K. Carl, N. Collins, P. Goering, F. Goodsaid, Y. Z. Gu, V.**  
527 **Guilpin, E. Harpur, A. Hassan, D. Jacobson-Kram, P. Kasper, D. Laurie, B. S. Lima, R.**  
528 **Maciulaitis, W. Mattes, G. Maurer, L. A. Obert, J. Ozer, M. Papaluca-Amati, J. A. Phillips,**  
529 **M. Pinches, M. J. Schipper, K. L. Thompson, S. Vamvakas, J. M. Vidal, J. Vonderscher, E.**  
530 **Walker, C. Webb, and Y. Yu.** 2010. Towards consensus practices to qualify safety biomarkers  
531 for use in early drug development. *Nat. Biotechnol.* **28**:446-454.
- 532 49. **Solomkin, J. S., J. E. Mazuski, J. S. Bradley, K. A. Rodvold, E. J. Goldstein, E. J. Baron, P.**  
533 **J. O'Neill, A. W. Chow, E. P. Dellinger, S. R. Eachempati, S. Gorbach, M. Hilfiker, A. K.**  
534 **May, A. B. Nathens, R. G. Sawyer, and J. G. Bartlett.** 2010. Diagnosis and management of



- 535 complicated intra-abdominal infection in adults and children: guidelines by the Surgical  
536 Infection Society and the Infectious Diseases Society of America. *Clin Infect Dis* **50**:133-164.
- 537 50. **Taplitz, R. A., E. B. Kennedy, E. J. Bow, J. Crews, C. Gleason, D. K. Hawley, A. A.**  
538 **Langston, L. J. Nastoupil, M. Rajotte, K. Rolston, L. Strasfeld, and C. R. Flowers.** 2018.  
539 Outpatient Management of Fever and Neutropenia in Adults Treated for Malignancy: American  
540 Society of Clinical Oncology and Infectious Diseases Society of America Clinical Practice  
541 Guideline Update. *J. Clin. Oncol.* **36**:1443-1453.
- 542 51. **Tong, S. Y. C., D. C. Lye, D. Yahav, A. Sud, J. O. Robinson, J. Nelson, S. Archuleta, M. A.**  
543 **Roberts, A. Cass, D. L. Paterson, H. Foo, M. Paul, S. D. Guy, A. R. Tramontana, G. B.**  
544 **Walls, S. McBride, N. Bak, N. Ghosh, B. A. Rogers, A. P. Ralph, J. Davies, P. E. Ferguson,**  
545 **R. Dotel, G. L. McKew, T. J. Gray, N. E. Holmes, S. Smith, M. S. Warner, S. Kalimuddin,**  
546 **B. E. Young, N. Runnegar, D. N. Andresen, N. A. Anagnostou, S. A. Johnson, M. D.**  
547 **Chatfield, A. C. Cheng, V. G. Fowler, Jr., B. P. Howden, N. Meagher, D. J. Price, S. J. van**  
548 **Hal, M. V. N. O'Sullivan, J. S. Davis, and N. Australasian Society for Infectious Diseases**  
549 **Clinical Research.** 2020. Effect of Vancomycin or Daptomycin With vs Without an  
550 Antistaphylococcal beta-Lactam on Mortality, Bacteremia, Relapse, or Treatment Failure in  
551 Patients With MRSA Bacteremia: A Randomized Clinical Trial. *JAMA* **323**:527-537.
- 552 52. **Vaidya, V. S., J. S. Ozer, F. Dieterle, F. B. Collings, V. Ramirez, S. Troth, N. Muniappa, D.**  
553 **Thudium, D. Gerhold, D. J. Holder, N. A. Bobadilla, E. Marrer, E. Perentes, A. Cordier, J.**  
554 **Vonderscher, G. Maurer, P. L. Goering, F. D. Sistare, and J. V. Bonventre.** 2010. Kidney  
555 injury molecule-1 outperforms traditional biomarkers of kidney injury in preclinical biomarker  
556 qualification studies. *Nat Biotechnol* **28**:478-485.
- 557 53. **Waikar, S. S., R. A. Betensky, and J. V. Bonventre.** 2009. Creatinine as the gold standard for  
558 kidney injury biomarker studies? *Nephrol Dial Transplant* **24**:3263-3265.
- 559 54. **Waikar, S. S., and J. V. Bonventre.** 2009. Creatinine kinetics and the definition of acute kidney  
560 injury. *J Am Soc Nephrol* **20**:672-679.
- 561 55. **Weiss, A., and A. Elixhauser.** Overview of Hospital Stays in the Unites States, 2012. HCUP  
562 Statistical Brief#180. October 2014. Agency for Healthcare Reserach and Quality. Rockville,  
563 MD.
- 564 56. **Wunderink, R. G., M. S. Niederman, M. H. Kollef, A. F. Shorr, M. J. Kunkel, A. Baruch,**  
565 **W. T. McGee, A. Reisman, and J. Chastre.** 2012. Linezolid in methicillin-resistant  
566 *Staphylococcus aureus* nosocomial pneumonia: a randomized, controlled study. *Clin Infect Dis*  
567 **54**:621-629.
- 568 57. **Zhou, H., S. M. Hewitt, P. S. Yuen, and R. A. Star.** 2006. Acute Kidney Injury Biomarkers -  
569 Needs, Present Status, and Future Promise. *Nephrol Self Assess Program* **5**:63-71.
- 570
